# Supplementary material for: Q-HAM: a multicenter upfront randomized phase II trial of quizartinib and high-dose Ara-C plus mitoxantrone in relapsed/refractory AML with FLT3-ITD
Source: Springer Nature journal article supplement (doi:10.1186/s13063-023-07421-x), 2023-09-15
Supplement: MOESM3 [file 26048210]

2021.11.23

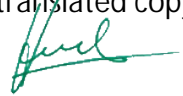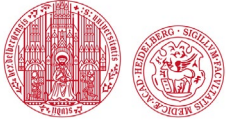

**MEDIZINISCHE  
FAKULTÄT  
HEIDELBERG**

Ethics Committee of the Med. HD Alte Glockengießerei 11/1 69115 Heidelberg

NCT Study Center Mr.  
Lucian Le Cornet  
Im Neuenheimer Feld 130/3  
69120 Heidelberg

The evaluation shall be carried out in consultation with the ethics committees involved, also listed in Annex 2.

cc:BfArM by e-mail  
Involved ethics committees by e-mail  
- Final shipment -

20.12.2019  
ts -bh

**FAVOURABLE OPINION**

**EudraCT no:** 2018-002675-17  
**Inspection plan code:** NCT-2017-0545 / HeLeNe-18-03-#545  
**Title:** Quizartinib and High-dose Ara-C plus Mitoxantrone in Relapsed/Refractory AML with FLT3-ITD (Q-HAM)  
**Sponsor:** Ruprecht-Karls-University of Heidelberg Medical Faculty represented in law by Heidelberg University Hospital  
**Applicant:** NCT Study Center, Heidelberg  
**LKP:** Prof. Dr. Richard F. Schlenk, Heidelberg  
**Our sign:** **AFmu-576/2019** (Please always specify)

Dear Sir,

The Ethics Committee considered your above request at its meeting on 26/08/2019. The additional information requested was received on **11/25/2019** and **12/10/2019** and **12/20/2019**, respectively.

**The Ethics Committee issues a favourable opinion.** Reason: There are

no grounds for refusal according to Section 42 (1) AMG. The evaluation is

based on the documents listed in Annex 1.

The evaluation shall be valid for the inspection bodies listed in Annex 2, together with their inspectors and alternates.

## University of Heidelberg Ethics Committee of the Faculty of Medicine

Old bell foundry 11/1 69115 Heidelberg

Phone +49 6221 56264-60 (head office)

Fax +49 6221 56264-80

ethikkommission-l@med.uni-heidelberg.de

[www.medizinische-fakultaet-hd.uni-heidelberg.de/ethics-commission](http://www.medizinische-fakultaet-hd.uni-heidelberg.de/ethics-commission)

### Chair:

Prof. Dr. med. Dr. h.c. Thomas Strowitzki

### Vice Chair:

Prof. Dr. med. Klaus Herfarth

### Management:

Dr. med. Verena Pfeilschifter

eFeedback

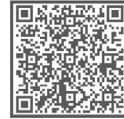

Scan or click

BIC SOLADEST600

IBAN DE64 6005 0101 7421 5004 29

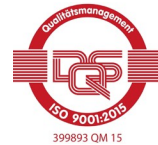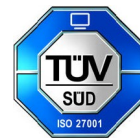

The positive assessment cannot yet be given for the trial sites listed in Appendix 3, including investigators and alternates, as we have not yet received a final opinion from the responsible ethics committee involved.

The Commissioners listed in Annex 4 took part in the vote. Yours sincerely

on  
be  
hal  
f of



Dr. Pfeilschifter, Verena  
TeleSec PKS eIDAS QES CA 1  
German Telekom AG  
Friday, 27. December 2019 15:02 CET

Prof. Dr. med. Dr. h.c. Thomas Strowitzki  
Chairman

## Attachments

Appendix 1-4

### General Notes:

- The ethical and legal responsibility for the conduct of this clinical trial remains with the sponsor, the principal investigator, and the investigators.
- The composition and functioning of the Ethics Committee comply with national laws, regulations and the ICH GCP Guideline as amended from time to time.
- An objection to this Opinion may be raised within one month of publication. The objection must be submitted in writing or recorded at the office of the Ethics Committee of the Medical Faculty Heidelberg, Alte Glockengießerei 11/1, 69115 Heidelberg.
- Aspects of research projects relating to data protection law are only examined by the ethics committee in a cursory manner. This vote/assessment therefore does not replace consultation with the responsible data protection officer. Compliance with the relevant data protection laws and the implementation of the data protection concept are the responsibility of the study director/investigator or sponsor.

## Appendix 1

### List of documents submitted

|                                     |                                                                                                                                                                                                                                                                                                                                                                                                                                                                                                                                                                                                                                                                                                                                                                                                                                                                                                                                                                                                                                                                                                                                                                                                                                                                                                                                                                                                                                                                                                                                                                                                                                                                                                                                                                                                                                                                                                                                                                                                                                                                                                                                                                                                                                                                                                                                                                                                                                                                                                                                                                                                                                                                                                                                                                                                                                                                                             |
|-------------------------------------|---------------------------------------------------------------------------------------------------------------------------------------------------------------------------------------------------------------------------------------------------------------------------------------------------------------------------------------------------------------------------------------------------------------------------------------------------------------------------------------------------------------------------------------------------------------------------------------------------------------------------------------------------------------------------------------------------------------------------------------------------------------------------------------------------------------------------------------------------------------------------------------------------------------------------------------------------------------------------------------------------------------------------------------------------------------------------------------------------------------------------------------------------------------------------------------------------------------------------------------------------------------------------------------------------------------------------------------------------------------------------------------------------------------------------------------------------------------------------------------------------------------------------------------------------------------------------------------------------------------------------------------------------------------------------------------------------------------------------------------------------------------------------------------------------------------------------------------------------------------------------------------------------------------------------------------------------------------------------------------------------------------------------------------------------------------------------------------------------------------------------------------------------------------------------------------------------------------------------------------------------------------------------------------------------------------------------------------------------------------------------------------------------------------------------------------------------------------------------------------------------------------------------------------------------------------------------------------------------------------------------------------------------------------------------------------------------------------------------------------------------------------------------------------------------------------------------------------------------------------------------------------------|
| <b>Primary Submitted Documents:</b> | <p>Letter dated 05.08.2019</p> <p>Anl 34_Summary dt, undated</p> <p>Checklist of the working group of the ethics committees of 02.08.2019</p> <p>Module 1 of 06.08.2019</p> <p>Module 2 from 05.08.2019</p> <p>Confirmation letter EudraCT number dated 04.07.2018</p> <p>Cost absorption statement dated 15.07.2019.</p> <p>Versicherungsbestätigung vom 08.03.2019, Versicherungsschein-Nr.: 5701031003018</p> <p>Contribution invoice dated 08.03.2019, policy number: 81940702 03078 390 2668001 (incl. attachment to invoice).</p> <p>Asset Register</p> <p>Patient information and consent form, version _V1_1 of 05.08.2019 Anl 17_Risk_Benefit_Weighing, undated.</p> <p>Protocol, version 1.2 as of 05.08.2019</p> <p>INVESTIGATOR'S BROCHURE Quizartinib, version 12.0 as of 04/26/2019</p> <p>Annex 08_Name and Characterization Active Substances, undated.</p> <p>CV Prof. Dr. Richard F. Schlenk as at Aug 05, 2019</p> <p>Certificate "Study Update Hematology and GCP Training" Prof. Dr. Richard F. Schlenk from 11.03.2017 (incl. agenda)</p> <p>Certificate of Participation "GCP/AMG Training" (Basic Course) Prof. Dr. Richard F. Schlenk from 07.10.2015 (incl. training contents)</p> <p>Certificate "Study Leader Course" Prof. Dr. Richard F. Schlenk from 23.11.2018 CV Dr. med. Tim Sauer from 05.08.2019</p> <p>Study Experience Tim Sauer, MD Aug 05, 2019</p> <p>Certificate "AMG Advanced Course for Examiners / Deputies (Ä2) " Dr. med. Tim Sauer from 02.07.2019</p> <p>Certificate of attendance "Investigator Course" Dr. med. Tim Sauer from 07.03.2009 (incl. content)</p> <p>FDS Prof. Dr. Richard F. Schlenk from 07.08.2019 FDS Dr. med. Tim Sauer from 07.08.2019</p> <p>Site Qualification Form for Examiners, Substitutes (Heidelberg) from 05.08.2019 (P/Deputy)</p> <p>Centre-specific documents</p> <p>KKS compulsory consultation notice of 03.07.2019 KKS compulsory consultation notice of 07.08.2019</p> <p>Contract on the Support of a Clinical Trial (IIT) between Heidelberg University Hospital and Medical Clinic V dated 15.05.2019 (LKP / Medical Director) resp. 27.05.2019 (Commercial Director Uniklinik HD) Responsibility Split dated 27.05.2019 (LKP/IMBI/ QoL DKFZ) resp. 07.06.2019 (KKS Heidelberg) resp. 28.05.2019 (LAB Dept. Internal Medicine V)</p> <p>Annex 20_Financing, undated</p> <p>(Sample) contract, submission dated June 12, 2019, undated.</p> <p>Statement on number of paper-based documents to the participating ethics committees dated 05/08/2019.</p> <p>Anl 09_Subject of the clinical trial, undated</p> <p>Annex 10_Number, age and sex of persons concerned, undated Annex 11_Criteria for selection, undated</p> <p>Annex 12_Justification of gender distribution, undated</p> <p>Annex 13_Treatment plan, undated</p> <p>Attachment 15_disclosure of pseudonymised data from 01.08.2019</p> |
|-------------------------------------|---------------------------------------------------------------------------------------------------------------------------------------------------------------------------------------------------------------------------------------------------------------------------------------------------------------------------------------------------------------------------------------------------------------------------------------------------------------------------------------------------------------------------------------------------------------------------------------------------------------------------------------------------------------------------------------------------------------------------------------------------------------------------------------------------------------------------------------------------------------------------------------------------------------------------------------------------------------------------------------------------------------------------------------------------------------------------------------------------------------------------------------------------------------------------------------------------------------------------------------------------------------------------------------------------------------------------------------------------------------------------------------------------------------------------------------------------------------------------------------------------------------------------------------------------------------------------------------------------------------------------------------------------------------------------------------------------------------------------------------------------------------------------------------------------------------------------------------------------------------------------------------------------------------------------------------------------------------------------------------------------------------------------------------------------------------------------------------------------------------------------------------------------------------------------------------------------------------------------------------------------------------------------------------------------------------------------------------------------------------------------------------------------------------------------------------------------------------------------------------------------------------------------------------------------------------------------------------------------------------------------------------------------------------------------------------------------------------------------------------------------------------------------------------------------------------------------------------------------------------------------------------------|

(LKP) Attachment 16\_meaning of clinical trial, undated  
Annex 25\_Methods of investigation envisaged, undated  
Annex 26\_Simultaneous participation in study, undated

Annex 29\_Compensation of auditors and compensation of data subjects,  
undated Annex 30\_ Data protection compliance of 15.07.2019 (LKP)  
Annex 32\_Criteria for suspension or early termination, undated Annex  
05\_Institutions involved, undated  
Annex 33\_List of ECs involved, undated  
Annex 04\_name and address of sponsor,  
undated CD-ROM

**Formal  
Submission:**

Letter from Prof. Richard F. Schlenk dated 08/21/2019 Letter  
from LKP regarding funding dated 06/28/2019.  
Cooperation Agreement between Study Center of the Dept. of Internal Medicine V  
and Institute of Medical Biometry and Informatics (IMBI) (version of 06/27/2019)  
dated 06/27/2019 (LKP) and 06/28/2019 (Director IMBI), respectively.  
Clinical Trial Agreement between Study Center of the Dept. of Internal Medicine V  
and Institute of Medical Biometry and Informatics (IMBI) (version of 06/27/2019)  
dated 06/27/2019 (LKP) and 06/28/2019 (Director IMBI), respectively.  
Agreement on the Support of an Investigator Initiated Trial between Heidelberg  
University Hospital and Daiichi Sankyo Europe GmbH (version of 16.05.2018)  
dated 27.08.2018 (Kaufmann Direktorin Uni Heidelberg / Daiichi Sankyo Europe  
GmbH) resp. 20.08.2018 (LKP) resp. 21.08.2018 (ärztl Direktor Innere Medizin V)  
AMENDMENT No. 1 TO Investigator Initiated Study AGREEMENT between  
Heidelberg University Hospital and Daiichi Sankyo Europe GmbH (version of  
14.08.2018) dated 12.09.2018 (Kaufmann Direktorin Uni Heidelberg) resp.  
21.08.2018 (Daiichi Sankyo Europe GmbH) resp. 07.09.2018 (ärztl Direktor Innere  
Medizin V) resp. 06.09.2018 (LKP)  
Sponsor obligations in drug trials in IITs dated 24.06.2019 (LKP)  
Budget plan Q-HAM, version dated 02.07.2019.  
Annex 00\_0\_list of facilities, version 01HD dated 21/08/2019  
Annex 05\_involved facilities dated 21/08/2019.  
Annex 33\_List of ECs involved as of 15.08.2019  
Special agreements for proband annual insurance for universities / university  
hospitals for clinical trials / studies to be carried out in Germany ("Uni-  
Jahresvertrag"), as of: undated  
General Insurance Conditions for Insurable Clinical Trials of Medicinal  
Products/Annual Contract (AVB-Prob/AMG-JV) - U 199 -, as at: 1.16  
Privacy compliance statement dated 08/22/2019 Your email  
dated 08/23/2019.

Your email dated 2019-09-02  
Confirmation disclosure of pseudonymous data dated 31/08/2019 (LKP).

Your email dated 09/27/2019  
Center specific documents.

Your email dated 02/10/2019  
Center specific documents.

Letter from Prof. Dr. Schlenk dated 25.11.2019 Centre-  
specific documents  
CD-ROM

Letter from Prof. Dr. Schlenk dated 09.12.2019 List of  
Annexes  
Module 1 from 09.12.2019  
Centre-specific documents CD-  
ROM

**Substantive  
Submission:**

Letter from Prof. Dr. Schlenk dated 25.11.2019 List of Annexes  
Insurance policy accident insurance no. 50079192101 dated 24.09.2019 General conditions for the SV accident insurance (SVAUB 2017), version January 2017.  
Supplementary conditions for group accident insurance (ZB Gruppen-UV), version September 2014  
Data protection information, version 01.10.2018 CD-ROM

Letter from Prof. Dr. Schlenk dated 09.12.2019 List of Annexes  
Protocol, version 1.2ek as of 09.12.2019 (with and without changes marked).  
Patient information and consent form, version 1.1ek as of 09.12.2019 (with and without changes marked).  
Module 1 from 09.12.2019 CD-ROM

Letter from Prof. Dr. Schlenk dated 18.12.2019  
Patient information and consent form, version 1.1ekV2 of 18.12.2019 (with and without marking of the changes)  
Your email on 12/20/2019

## Annex 2

The positive evaluation is valid for the following inspection bodies including examiners and deputies:

| Ethics Committee                                                                                                                                                               | Examiner/Deputy Examiner/Testing Unit                                                                                                                                                                                                                             |
|--------------------------------------------------------------------------------------------------------------------------------------------------------------------------------|-------------------------------------------------------------------------------------------------------------------------------------------------------------------------------------------------------------------------------------------------------------------|
| Ethics Committee of the Medical Faculty<br>Heidelberg<br>Old bell foundry 11/1<br>69115 Heidelberg                                                                             | Prof. Dr. Richard F. Schlenk (P)<br>Dr. med. Tim Sauer (Deputy)<br>Heidelberg University Hospital<br>Dept. of Internal Medicine V<br>Im Neuenheimer Feld 410<br>69120 Heidelberg                                                                                  |
| Ethics Committee at the TU Dresden<br>Fetscherstraße 74<br>01307 Dresden<br><br>(letter dated Sep. 16, 2019)                                                                   | PD Dr. med. Christoph Röllig (P)<br>Dr. med. Jan Moritz Middeke (Deputy)<br>University Hospital Carl Gustav Carus Dresden<br>Medical Clinic and Polyclinic I<br>Fetscherstr. 74<br>01307 Dresden                                                                  |
| Ethics Committee at the Saxon State<br>Medical Association Schützenhöhe 16<br>01099 Dresden<br><br>(letter, Sept. 20, 2019)                                                    | PD Dr. med. Mathias Hänel (P)<br>Dr. med. Regina Herbst<br>(Deputy) Klinikum Chemnitz<br>gGmbH Clinic for Internal<br>Medicine III<br>Haematology/Oncology<br>Bürgerstr. 2<br>09113 Chemnitz                                                                      |
| Ethics Committee of the Medical Faculty of the<br>Martin Luther University Halle-Wittenberg<br>Magdeburger Straße 16<br>06112 Halle (Saale)<br><br>(letter dated Sep 04, 2019) | Maxi Wass, MD (P)*<br>PD Dr. med. Lutz Müller (Deputy)<br>University Hospital Halle (Saale)<br>Clinic and Polyclinic for Internal<br>Medicine IV Ernst-Grube-Str. 40<br>06120 Halle (Saale)                                                                       |
| Ethics Committee of the Friedrich<br>Schiller University Jena<br>Bachstraße 18<br>07743 Jena<br><br>(letter dated Sep 04, 2019)                                                | PD. Dr. med. Sebastian Scholl (P)<br>Dr. Ulf Schnetzke (Deputy)<br>University Hospital Jena<br>Clinic for Internal Medicine II<br>Haematology and Internal Oncology, Am<br>Klinikum 1<br>07747 Jena                                                               |
| Ethics Committee at the Medical Association<br>of Baden-Württemberg<br>Liebknechtstr. 33<br>70565 Stuttgart<br><br>(letter dated Aug. 28, 2019)<br>(letter dated 08 Oct. 2019) | Dr. med. Thomas Geer (P)<br>Dr. med. Ulrike Sokoll<br>(Deputy) Diakoneo<br>Diakonie Klinikum Schwäbisch Hall gGmbH<br>Internal Medicine III<br>Clinic for Hematology, Oncology and<br>Palliative Medicine<br>Diakoniestrasse 10<br>74523 Schwäbisch Hall          |
| Ethics Committee of the Bavarian<br>Medical Association<br>Mühlbauerstraße 16<br>81677 Munich<br><br>(letter dated Aug. 27, 2019)                                              | Dr. med. Kerstin Schaefer-Eckart (P)<br>Dr. med. Knut Wendelin (Deputy)<br>Paracelsus Medical Private University<br>Nuremberg North Hospital<br>Clinic for Internal Medicine 5 Focus on<br>Oncology / Hematology Prof.-Ernst-<br>Nathan-Str. 1<br>90419 Nuremberg |

|                                                                                                                                                                                                         |                                                                                                                                                                                                                         |
|---------------------------------------------------------------------------------------------------------------------------------------------------------------------------------------------------------|-------------------------------------------------------------------------------------------------------------------------------------------------------------------------------------------------------------------------|
| <p>Ethics Committee of the Medical Association of Westphalia-Lippe and the Westphalian Wilhelms University Münster<br/> Gartenstr. 210 - 214<br/> 48147 Münster</p> <p>(letter dated Aug. 22, 2019)</p> | <p>PD Dr. med. Martin Görner (P)<br/> Dr. med. Kai Wegehenkel<br/> (Deputy) Bielefeld Municipal Hospital<br/> Clinic for Hematology, Oncology and Palliative Medicine<br/> Teutoburger Str. 50<br/> 33604 Bielefeld</p> |
|---------------------------------------------------------------------------------------------------------------------------------------------------------------------------------------------------------|-------------------------------------------------------------------------------------------------------------------------------------------------------------------------------------------------------------------------|

The Ethics Committee involved points out the following:

\* Certificate of successful attendance at the advanced course on 27/09/2019 is to be submitted for the examiner in a timely manner.

## Appendix

### 9

The positive evaluation cannot yet be given for the following inspection bodies, including examiners and deputies:

| Ethics Committee                                                                                                                                         | Examiner/Deputy Examiner/Testing Unit                                                                                                                                                                                          |
|----------------------------------------------------------------------------------------------------------------------------------------------------------|--------------------------------------------------------------------------------------------------------------------------------------------------------------------------------------------------------------------------------|
| Ethics Committee at the Saxon State Medical Association Schützenhöhe 16<br>01099 Dresden<br><br>(letter dated Sept. 11, 2019)                            | Prof. Dr. med. Jörg Schubert (P)<br>Kathrin Petzold (Deputy)<br>Elblandklinikum Riesa<br>Clinic for Internal Medicine II<br>Haematology, oncology, gastroenterology and palliative medicine<br>Vineyard road 8<br>01589 Riesa* |
| Ethics Committee at the Medical Association of Baden-Württemberg<br>Liebknechtstr. 33<br>70565 Stuttgart<br><br>(letter dated Aug. 28, 2019)             | Prof. Dr. med. Mark Ringhoffer (P)**<br>Dr. med. Lukas Kuendgen (Deputy)**<br>Städtisches Klinikum Karlsruhe gGmbH<br>Medical Clinic III<br>Moltke Street 90<br>76133 Karlsruhe                                                |
| Ethics Committee at the Medical Association of Baden-Württemberg<br>Liebknechtstr. 33<br>70565 Stuttgart<br><br>(letter dated Aug. 28, 2019)             | Alexander Reichart, MD (P)<br>Prof. Dr. med. Markus Schaich<br>(Deputy)** Winnenden Hospital<br>Haematology, Oncology and Palliative Medicine Am Jakobsweg 1<br>71364 Winnenden                                                |
| Ethics Committee of the Medical Association of Westphalia-Lippe and the Westphalian Wilhelms University Münster<br>Gartenstr. 210 - 214<br>48147 Münster | Jan-Henrik Mikesch, MD (P)<br>Prof. Dr. Christoph Schliemann<br>(Deputy) University Hospital Münster<br>Medical Clinic A<br>Hematology, Oncology and Pneumology<br>Albert Schweitzer Campus 1<br>Building A1<br>48149 Münster  |

The competent ethics committee involved informs the following:

\*As per our letter dated 14/08/2019, supplementary documents including qualification certificates have been requested from the applicant and hence it is not yet possible to assess the testing agencies.

The investigators [...] and Dr Ringhofer as well as [...] the deputies Prof. Schaich and Dr Kündgen must provide evidence of an advanced course on clinical trials of medicinal products of at least 8 teaching units of 45 minutes each before the start of the study. The requirements of the German Medical Association of 25.01.2019 must also be taken into account. Evidence of training must be sent to the Commission in a timely manner. Please make sure that the confirmations always contain precise information on the content, time frame and mode of the training (can also be composed of various modules). Proof of participation in a 2-day examiner course that corresponds to the curricular recommendations of the German Medical Association and the Working Group of the Ethics Committees from 2013 can be recognised as equivalent.

## Appendix

10

The following members participated in the vote:

|                                     | Member                                                     | Department                                                                                                                          |
|-------------------------------------|------------------------------------------------------------|-------------------------------------------------------------------------------------------------------------------------------------|
| <input type="checkbox"/>            | Dr. med. Antje Blank<br>Clinical pharmacology              | Medic /Clinical Pharmacology u.<br>alClinic Pharmacoeepidemiology                                                                   |
| <input type="checkbox"/>            | Dr. Chobanyan-Jürgens, M.D.<br>Clinical pharmacology       | Medic /Clinical Pharmacology u.<br>alClinic Pharmacoeepidemiology                                                                   |
| <input checked="" type="checkbox"/> | Prof. Dr. med. David Czock<br>Clinical pharmacology        | Medic /Clinical Pharmacology u.<br>alClinic Pharmacoeepidemiology                                                                   |
| <input type="checkbox"/>            | Prof. Dr. med. Marc Freichel<br>Pharmacology               | Pharmacological Institute Heidelberg                                                                                                |
| <input type="checkbox"/>            | Dr. med. Barbara Grün<br>Clinical pharmacology             | ..ClinicalPharmacology,<br>NationalCenterforTumorDiseases Heidelberg                                                                |
| <input type="checkbox"/>            | Prof. Dr. med. Walter E. Haefeli<br>Clinical pharmacology  | Medical /DepartmentClin Pharmacology u.<br>Clinic Pharmacoeepidemiology ical                                                        |
| <input type="checkbox"/>            | Dr. Nicolas Hohmann<br>Pharmacology                        | FAf.ClinicalPharmacology,<br>NationalCenterforTumorDiseases Heidelberg                                                              |
| <input type="checkbox"/>            | Prof. Dr. phil. Michael Anderheiden<br>qualified lawyer    | Univ. Heidelberg / Institute for Constitutional Law, Constitutional Theory and Philosophy of Law                                    |
| <input checked="" type="checkbox"/> | Prof. Dr. Jens Bülte<br>qualified lawyer                   | University of Mannheim / Chair of Criminal Law, Criminal Procedure Law, Economic and Fiscal Criminal Law                            |
| <input type="checkbox"/>            | Prof. Dr. Ralf Müller-Terpitz<br>qualified lawyer          | Univ. Mannheim / Chair of Public Law, Law of Economic Regulation and Media                                                          |
| <input type="checkbox"/>            | Prof. Dr. jur. Jochen Taupitz<br>qualified lawyer          | Institute for German, European and International Medical Law, Health Law and Bioethics of the University of Heidelberg and Mannheim |
| <input checked="" type="checkbox"/> | Prof. Dr. Justo Lorenzo Bermejo<br>Medical biometry        | Institute for Medical Biometry and Informatics                                                                                      |
| <input type="checkbox"/>            | Dipl-Stat. Axel Benner<br>Medical biometry                 | German Cancer Research Center Heidelberg / Dept. of Biostatistics                                                                   |
| <input type="checkbox"/>            | Dr. sc. hum., Dipl.-Math. Tom Bruckner<br>Medical biometry | Institute for Medical Biometry and Informatics                                                                                      |
| <input type="checkbox"/>            | Prof. Dr. Meinhard Kieser<br>Medical biometry              | Institute for Medical Biometry and Informatics                                                                                      |
| <input type="checkbox"/>            | Prof. Dr. Annette Kopp-Schneider<br>Medical biometry       | German Cancer Research Center Heidelberg / Dept. of Biostatistics                                                                   |
| <input type="checkbox"/>            | Dr. sc. hum. Anja Sander, M. Sc<br>Medical biometry        | Institute for Medical Biometry and Informatics                                                                                      |
| <input type="checkbox"/>            | Dipl. Math. Svenja Schüler<br>Medical biometry             | Institute for Medical Biometry and Informatics                                                                                      |
| <input checked="" type="checkbox"/> | Dr. med. Verena Pfeilschifter<br>Medical Ethics            | Office of the Ethics Committee of the Medical Faculty Heidelberg                                                                    |
| <input type="checkbox"/>            | Michael Reichert<br>Medical Ethics                         | Help for the elderly of the Evang. Stadtmission Heidelberg                                                                          |
| <input type="checkbox"/>            | Rebekka Steel<br>Nursing service                           | Center for Orthopedics, Trauma Surgery and Paraplegiology / Dept. of Orthopedics and Trauma Surgery                                 |

## Appendix

|                                     |                                                |                                                    |
|-------------------------------------|------------------------------------------------|----------------------------------------------------|
| <input type="checkbox"/>            | Dr. phil. Nicole Maria Bauer<br>Medical layman | Univ. Innsbruck / Institute for Practical Theology |
| <input type="checkbox"/>            | Christiane Calis<br>Medical layman             | Public Relations Office of the City of Heidelberg  |
| <input type="checkbox"/>            | Peter Grünewald<br>Medical layman              | Theologian, St. Raphael High School Heidelberg     |
| <input checked="" type="checkbox"/> | Renate Walter<br>Medical layman                | Housewife                                          |
| <input type="checkbox"/>            | Carina Welsch<br>Medical layman                | Special Education Teacher                          |

|                                     |                                                                           |                                                                                                                                           |
|-------------------------------------|---------------------------------------------------------------------------|-------------------------------------------------------------------------------------------------------------------------------------------|
| <input type="checkbox"/>            | Prof. Dr. med. Stefan Delorme<br>Radiology                                | German Cancer Research Center Heidelberg / Dept. of Radiology                                                                             |
| <input type="checkbox"/>            | PD Dr. med. Monika Eichinger<br>Radiology                                 | Thorax Clinic Heidelberg / Diagnostic and Interventional Radiology                                                                        |
| <input type="checkbox"/>            | Dr. med. Sabine Haufe<br>Radiotherapy                                     | Radiology Clinic / Dept. of Nuclear Medicine                                                                                              |
| <input checked="" type="checkbox"/> | Prof. Dr. med. Klaus Herfarth<br>Radiology                                | Radiology Clinic / Dept. of Radiooncology and Radiotherapy                                                                                |
| <input type="checkbox"/>            | Angela Paul, MD<br>Radiotherapy                                           | Radiology Clinic / Dept. of Radiooncology and Radiotherapy                                                                                |
| <input type="checkbox"/>            | Prof. Dr. med. Thomas Strowitzki<br>Gynecology                            | Gynaecological Clinic/Gynaecological<br>Endocrinology and<br>Fertility disorders                                                          |
| <input type="checkbox"/>            | Susanne Picardi, MD<br>Anesthesia                                         | Anaesthesiology Clinic                                                                                                                    |
| <input type="checkbox"/>            | Prof. Dr. med. Tanja M. Rabsilber<br>Ophthalmology                        | University Eye Hospital                                                                                                                   |
| <input type="checkbox"/>            | Prof. Dr. med. Katrin Hoffmann<br>Surgery                                 | Surgical Clinic / Clinic for General, Visceral and Transplant Surgery                                                                     |
| <input type="checkbox"/>            | Prof. Dr. med. Claudia Sommerer<br>Surgery                                | Surgical Clinic / Clinic for General, Visceral and Transplant Surgery                                                                     |
| <input type="checkbox"/>            | Prof. Dr. med. Alexander Scharf<br>Gynecology                             | Practice for prenatal medicine Darmstadt                                                                                                  |
| <input type="checkbox"/>            | PD Dr. med. Johann Greil<br>Pediatrics                                    | Cent. f. Pediatric and Adolescent Medicine / Dept. III Pediatric<br>Hematology and Oncology                                               |
| <input type="checkbox"/>            | PD Dr. med. Peter Ruef<br>Pediatrics                                      | SLK Clinics Heilbronn / Clinic for Paediatrics and Adolescent<br>Medicine                                                                 |
| <input type="checkbox"/>            | Prof. Dr. med. Claus-Peter Schmitt<br>Pediatrics                          | Cent. f. Pediatrics and Adolescent Medicine / Dept. of General<br>Pediatrics, Neuropediatrics Metabolism, Gastroenterology,<br>Nephrology |
| <input type="checkbox"/>            | Philipp Ehlermann, MD<br>Cardiology                                       | Medical Clinic / Dept. III Cardiology, Angiology and Pneumology                                                                           |
| <input type="checkbox"/>            | Dr. med. Jürgen Krauss<br>Oncology                                        | National Center for Tumor Diseases Heidelberg / Dept. of<br>Medical Oncology                                                              |
| <input type="checkbox"/>            | Prof. Dr. med. Birgit Friedmann-<br>Bette<br>Sports Medicine              | Medical Clinic / Dept. VII Sports Medicine                                                                                                |
| <input type="checkbox"/>            | Dr. med. Dr. med. dent. Julia<br>Katharina Kansy<br>Maxillofacial Surgery | Oral, Dental, Maxillofacial Clinic / Dept. f. Mouth,<br>Jaw & Facial Surgery                                                              |
| <input checked="" type="checkbox"/> | Prof. Dr. med. Peter Ringleb<br>Neurology                                 | Neurological Clinic / Dept. of Neuroradiology and Polyclinic                                                                              |
| <input type="checkbox"/>            | Prof. Dr. med. Thorsten Steiner<br>Neurology                              | Klinikum Frankfurt Hoechst / Neurological Clinic                                                                                          |
| <input type="checkbox"/>            | Prof. Dr. med. Wolfgang Wick<br>Neurology                                 | Neurological Clinic / Dept. of Neurology and Polyclinic                                                                                   |
| <input type="checkbox"/>            | Prof. Dr. phil. Beate Ditzen<br>Medical psychology                        | Institute for Medical Psychology                                                                                                          |
| <input type="checkbox"/>            | Joanne Nyarangi-Dix, M.D.<br>Urology                                      | Surgical Clinic / Dept. of Urology                                                                                                        |
| <input type="checkbox"/>            | PD Dr. Dr. med. Ute Moog<br>Human Genetics                                | Institute of Human Genetics                                                                                                               |
