# Supplementary material for: Q-HAM: a multicenter upfront randomized phase II trial of quizartinib and high-dose Ara-C plus mitoxantrone in relapsed/refractory AML with FLT3-ITD
Source: Springer Nature journal article supplement (doi:10.1186/s13063-023-07421-x), 2023-09-15
Supplement: MOESM3 [file 26048210]

Passion for Innovation.  
Compassion for Patients.™

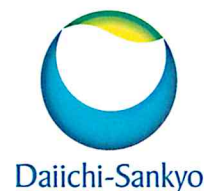

Daiichi Sankyo Europe GmbH · 81366 Munich · Germany

Prof Dr Richard F. Schlenk  
Head of NCT-Trial Center  
National Center for Tumor Diseases  
Im Neuenheimer Feld 130.3  
69120 Heidelberg

Daiichi Sankyo Europe GmbH  
Zielstattstrasse 48  
81379 Munich · Germany  
Phone +49 89 78080  
Fax +49 89 7808267  
service@daiichi-sankyo.eu  
www.daiichi-sankyo.eu

Jan 19, 2018

Dear Professor Schlenk,

I am pleased to inform you that the Investigator-Initiated Study (IIS) Committee of Daiichi Sankyo Inc. (DSI) has approved supporting your study entitled **“Quizartinib and High-dose Ara-C plus Mitoxantrone in Relapsed/Refractory AML with FLT3-ITD”**.

Please be aware that approval of your study proposals with funding in the total amount of approximately [REDACTED] is contingent upon review of the final protocols.

After the above is completed, approval will be pending our internal legal office review and preparation of a legal agreement.

**The following information will be required by DSE before we can begin working on your legal agreement. Please submit the items indicated below at your earliest convenience.**

- ☐ Name, phone, address, and fax number of a contract person in your institution's contract office
- ☐ Bank Account Details

A legal agreement has been drafted by Daiichi Sankyo Europe and will be forwarded to your legal department after the above mentioned information is available.

Please send all of the aforementioned documents via email to [REDACTED] at [REDACTED]@daiichi-sankyo.eu. You can reach [REDACTED] at +49 (0)89 [REDACTED].

If I can assist you in any way, please feel free to contact me.

Passion for Innovation.  
Compassion for Patients.™

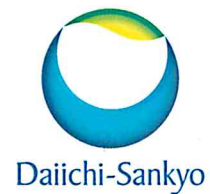

Sincerely,

**Heidi Anthoni, PhD**  
Daiichi Sankyo Europe  
SM Medical Affairs Oncology & Biologics

cc: [REDACTED], PharmD, Global Medical Affairs Oncology  
[REDACTED] PhD, Clinical Operations  
[REDACTED], MAS, Global Medical Affairs Oncology, Clinical Operations
