# Supplementary material for: Q-HAM: a multicenter upfront randomized phase II trial of quizartinib and high-dose Ara-C plus mitoxantrone in relapsed/refractory AML with FLT3-ITD
Source: Trials. 2023 Sep 15;24:591. doi: 10.1186/s13063-023-07421-x (PMC10504729; doi:10.1186/s13063-023-07421-x)
Supplement: Supplementary file 3 — Additional file 3. Ethical and funding approval documentation. [file 13063_2023_7421_MOESM3_ESM.zip]

Archive with 2 entries (2 files):
- 20180119 IIS Endorsement Letter Prof Schlenk_19_01_2018 geschwärzt.pdf
- 20191220 ZB 57619 Ersteinreichung EN.pdf
